# Supplementary material
Source: PubMed Central journal article supplement (PMC3102791)
Supplement: NIHMS275552-supplement-2.pdf [file NIHMS275552-supplement-2.pdf]

## **SUPPLEMENTARY MATERIALS**

### **Aberrant Lipid Metabolism Disrupts Calcium Homeostasis Causing Liver ER Stress in Obesity**

Suneng Fu, Ling Yang, Ping Li, Oliver Hofmann, Lee Dicker, Winston Hide, Xihong Lin, Steven M. Watkins, Alexander Ivanov, and Gökhan S. Hotamisligil

#### **List of Supplementary Materials:**

- 1, Full Methods;
- 2, Supplementary Figure Legends;
- 3, Supplementary References;
- 4, Supplementary Figure 1: ER fractionation and validation.
- 5, Supplementary Figure 2: Expression of ER stress markers in the obese liver.
- 6, Supplementary Figure 3: Distinct contributions of dietary fat and *de novo* lipogenesis to ER lipid composition.
- 7, Supplementary Figure 4: The effect of *Pemt* knockdown on liver ER lipidome and ER stress in *ob/ob* mice.
- 8, Supplementary Figure 5: Amelioration of ER stress in the liver of high-fat diet (HFD) induced obese mouse by *Pemt* knockdown.
- 9, Supplementary Figure 6: SERCA2b overexpression improves systematic glucose homeostasis of *ob/ob* mice.
- 10, Supplementary Figure 7: Detergent-dependent solubilization of SERCA2b protein from fatty liver samples and comparison of SERCA2b expression in lean and obese animals.

11, Supplementary Table 1: The liver ER proteome of lean and obese (ob/ob) mouse;

12, Supplementary Table 2a and 2b: The differentially regulated proteins in the lean and obese ER proteome;

13, Supplementary Table 3: The lipid compositions of diet consumed by mice and ER samples of lean and obese (ob/ob) mouse livers;

14, Supplementary Table 4: The ER lipid composition of obese mouse liver following the administration of *Pemt* or *lacZ* shRNA control viruses;

15, Supplementary Table 5: Fatty acid composition differences in the ER of obese liver following the administration of *Pemt* or *lacZ* shRNA Control viruses;

16, Supplementary Table 6: Oligonucleotide sequences used in this study.

## **FULL METHODS**

### **Animals**

Male leptin deficient (*ob/ob*) and wild type littermates in the C57BL/6J background were bred in house and used for all biochemical experiments. Leptin deficient mice used for adenovirus-mediated expression experiments were purchased from the Jackson Laboratory (strain B6.V-Lep<sup>ob</sup>/J, stock number 000632). All mice were maintained on a 12-hour-light /12-hour-dark cycle in a pathogen-free barrier facility with free access to water and regular chow diet containing 2200ppm of choline (PicoLab® Mouse Diet 20).

### **ER fractionation**

ER fractionation protocols were adapted from Cox and Emili (2006)<sup>22</sup>. Briefly, male mice at three months of age (unless otherwise noted) with or without overnight fasting were anesthetized by tribromoethanol and perfused with 20ml 0.25M sucrose solution before tissue harvesting. Fresh liver tissue (1.0g for lean and 1.2g for obese mice produced an equal amount of ER) was immediately transferred to 10ml ice cold STM buffer (0.25M sucrose, 50mM Tris pH7.4, 5mM MgCl<sub>2</sub>), chopped into small pieces and homogenized by 6 strokes in a motor-driven, loose-fit, teflon-glass homogenizer at speed setting of 3.5 (Wheaton, NJ). The whole lysates were first cleared by centrifugation at 3000g for 10 minutes followed by a series of centrifugations to obtain the final ER pellet. The pellet was washed with 11ml of ice-cold 0.25M sucrose solution and was subjected to

centrifugation to obtain the final ER preparation which was either snap frozen in liquid nitrogen or used directly for biochemical and other analysis.

### **Sample prefractionation by 1D-PAGE**

20  $\mu\text{l}$  (~100  $\mu\text{g}$ ) of the ER protein extract was boiled for 5 minutes in an equal volume of 2x Laemmli buffer and separated on a 12% SDS-poly-acrylamide gel (15 cm x 15 cm x 1.0 mm). The gel was minimally stained with Coomassie Brilliant Blue and briefly washed in 25% methanol, 7.5% acetic acid and sliced horizontally into 12 bands with roughly similar protein content as estimated from the optical density<sup>25</sup>. The gel was then cut vertically to separate the protein content of individual lanes. The gel slices were minced with a sterile clean razor blade, transferred into 96-well plates, washed three times with 200  $\mu\text{L}$  of 25 mM ammonium bicarbonate 50% acetonitrile, followed by dehydration with 100  $\mu\text{L}$  HPLC-grade acetonitrile. After removal of acetonitrile, the gel slices were dried completely in a vacuum concentrator (SpeedVac, Thermo, MA) and rehydrated in 200  $\mu\text{L}$  of 50 mM ammonium bicarbonate containing 1  $\mu\text{g}/\text{ml}$  trypsin, followed by incubation for 24 h at 37°C. Protein digests were collected and the gel pieces were further extracted and washed a) with 200  $\mu\text{L}$  of aqueous 20 mM ammonium bicarbonate pH 8.6; b) twice with 200  $\mu\text{L}$  of 2% formic acid 50% HPLC-grade acetonitrile, followed by c) dehydration in 150  $\mu\text{L}$  of 2% formic acid 10% 2-propanol 85% acetonitrile. The combined peptide solutions were filtered using hydrophilic multiwell PTFE filter plates (Millipore, MA) according to the manufacturer's protocol and concentrated to a volume of ~5  $\mu\text{L}$  in a SpeedVac,

and resuspended in 60  $\mu$ l aqueous solvent containing 2% formic acid, 2% acetonitrile. Samples were analyzed by 1D nano-LC ESI tandem mass spectrometry as described below.

### **Protein identification by 1D nano-LC tandem mass spectrometry**

**LC MS/MS instrumentation:** A CTC Autosampler (LEAP Technologies, NC) was equipped with two 10-port Valco valves and a 20  $\mu$ l injection loop. A 2D LC system (Eksigent, CA) was used to deliver the flow rate of 3  $\mu$ l/min during sample loading and 250 nl/min during nanoflow rate LC separation. Self packed columns used: a C18 solid phase extraction “trapping” column (250  $\mu$ m i.d. x 10 mm) and a nano-LC capillary column (100  $\mu$ m i.d. x 15 cm, 8  $\mu$ m i.d. pulled tip (NewObjective) both packed with the Magic C18AQ, 3  $\mu$ m, 200 Å (Michrom Bioresources) stationary phase. A protein digest (10  $\mu$ l) was injected onto the trapping column connected on-line with the nano-LC column through the 10-port Valco valve. The sample was cleaned up and concentrated using the trapping column, eluted onto and separated on the nano-LC column with a one-hour linear gradient of acetonitrile in 0.1% formic acid. The LC MS/MS solvents were Solvent A: 2% acetonitrile in aqueous 0.1% formic acid; and Solvent B: 5% isopropanol 85% acetonitrile in aqueous 0.1% formic acid. The 85-minute long LC gradient program included the following elution conditions: 2%B for 1 minute; 2-35%B in 60 minutes; 35-90%B in 10 minutes; 90%B for 2 minutes; and 90-2%B in 2 minutes. The eluent was introduced into LTQ Orbitrap (ThermoElectron, CA) mass spectrometer equipped with a nanoelectrospray source (New Objective,

MA) by nanoelectrospray. The source voltage was set to 2.2 kV and the temperature of the heated capillary was set to 180 °C. For each scan cycle on full MS scan was acquired in the Orbitrap mass analyzer at 60,000 mass resolution,  $6 \times 10^5$  AGC target and 1200 ms maximum ion accumulation time was followed by 7 MS/MS scans acquired for the 7 most intense ions for each of the following m/z ranges 350-700, 695-1200, and 1195-1700 amu. The LTQ mass analyzer was set for 30,000 AGC target and 100 ms maximum accumulation time, 2.2 Da isolation width, and 30 ms activation at 35% normalized collision energy. Dynamic exclusion was enabled for 45 s for each of the 200 ions that had been already selected for fragmentation to exclude them from repeated fragmentation. Each digest was analyzed twice.

**MS data processing:** The MS data .raw files acquired by the LTQ Orbitrap mass spectrometer were copied to the Sorcerer IDAll search engine (Sage-N Research, Thermo Electron, CA) and submitted for database searches using the SEQUEST-Sorcerer algorithm. The search was performed against a concatenated FASTA protein database containing the forward and reversed human (25H.Sapiens) UniProt KB database downloaded from EMBL-EBI on 10.23.2008 as well as an in-house compiled database with common contaminants. Methionine, histidine, and tryptophane oxidation (+15.994915 atomic mass units, amu) and cysteine alkylation (+57.021464 amu with iodoacetamide derivative) were set as differential modifications. No static modifications or differential posttranslational modifications were employed. A peptide mass tolerance equal to 30 ppm and a fragment ion mass tolerance

equal to 0.8 amu were used in all searches. Monoisotopic mass type, fully tryptic peptide termini, and up to 2 missed cleavages were used in all searches. The SEQUEST output was filtered, validated, and analyzed using Peptide Prophet, Protein Prophet (Institute for Systems Biology, WA) and Scaffold (Proteome Software, OR) software. The balance between reliability and sensitivity of the protein identification data was set by adjusting the estimated false positive peptide identification rate (FPR) to below 0.5%. The FPR was calculated as the number of peptide matches from a “reverse” database divided by the total number of “forward” protein matches, in percentages. The semiquantitative spectral count data sets obtained for all samples were subsequently integrated and processed using the in-house written software ProMerger which allowed us to compare proteomic profiles derived from different samples and perform the downstream pathway analysis.

### **Statistical methods of proteomic analysis**

Spectral counts were computed for each protein in each sample by utilizing high quality MS/MS-based peptide identifications. In this study, we were primarily interested in detecting differentially abundant proteins between lean and obese mice, as opposed to absolute protein quantification or cross-protein comparisons of abundance, and we ultimately restricted our attention to proteins with average spectral count (across samples) greater than 5 for better reliability<sup>26</sup>. This obviates the need for certain within-protein normalization techniques<sup>25,27,28</sup>. To identify differentially abundant proteins, we fit a Poisson mixed model<sup>29</sup> for each protein. The Poisson mixed model allows for a principled treatment of discrete

count data and provides a statistically rigorous framework for the identification of differentially abundant proteins accounting for correlation among repeated measures and over-dispersion. A similar approach is followed in Choi et al.,<sup>30</sup>. However, our approach relies on fewer modeling assumptions than the Bayesian approach advocated by Choi et al., where variability of abundance is assumed to be constant across proteins -- a strong assumption that generally does not hold in practice. Our approach does not require this assumption. Because we rely on fewer modeling assumptions, it is reasonable to expect that our procedure is in fact more robust to model misspecification than Choi et al.'s.

The Poisson mixed model, unlike an ordinary Poisson model, accounts for over-dispersion often present in spectral count data. Indeed, to account for over-dispersion, we included a random intercept term for each mouse in the experiments. Furthermore, in order to adjust for difference in the overall protein abundance in each sample, we include an offset term depending on the total spectral counts (across all proteins) in each sample. Finally, even after including the offset term, we noticed substantial differences between the experiments, thus we controlled for an experiment effect in our analysis. In summary, for each protein, we fit the model described by the equation

$$\log(\mu_{ijk}) = \log(t_{ijk}) + \alpha + b_j + \gamma_k + \delta x_{ij}$$

where  $\mu_{ijk}$  is the expected spectral count for the  $i$ -th technical replicate from the  $j$ -th mouse in experiment  $k$ , conditional on the mean zero mouse-specific random effect  $b_j$ ;  $t_{ijk}$  is the total spectral counts in the sample;  $\gamma_k$  represents the  $k$ -th



experiment effect; and  $x_j = 0$  or 1 according to whether the  $j$ -th mouse was from the lean or obese group and  $\beta$  is the corresponding lean/obese effect. A total of five experiments were conducted. Each was comprised of four mice -- two lean and two obese samples. In one of the experiments, two samples per mouse were available (technical replicates), while in the other four experiments only a single sample per mouse was available. Thus, for each Poisson mixed model fit, a total of 24 observations were utilized. For us, the parameter of primary interest was  $\beta$ . For each protein, we obtained a  $p$ -value corresponding to  $\beta$ , and proteins were ranked by these  $p$ -values for significance. We used the R library lme4 to fit the Poisson mixed models.

### **Bioinformatic analysis of proteomics**

Proteins identified as significantly up- or down-regulated in the obese ER proteome were analyzed by Database for Annotation, Visualization and Integrated Discovery (DAVID, <http://david.abcc.ncifcrf.gov/>)<sup>31,32</sup> and plotted in R. Clustering analysis was carried out with the Cluster3.0 program<sup>33</sup> and visualized either in JavaTreeview or MeV<sup>33,34</sup>. Functional annotation charts of proteins of interest (absolute median fold change  $\geq 1.5$ , significance of fold change  $\leq 0.05$ , average unadjusted spectral count of 5 across all experiments) were generated using the 'Biological Pathways' subset of Gene Ontology included in the DAVID System<sup>38</sup> using all identified ER proteins as the background set. Biological pathway annotations were manually curated to remove redundant (identical) annotations associated with the same sets of proteins.

## **Quantitative profiling of lipids and fatty acid compositions of ER and statistics**

ER pellets (~50mg) were resuspended in 1ml of 0.25M sucrose, 200 $\mu$ l of which was used for lipid extraction in the presence of authentic internal standards by the method of Folch et al., with chloroform:methanol (2:1 v/v)<sup>35</sup>. Individual lipid classes were separated and quantified by liquid chromatography (Agilent Technologies model 1100 Series). To obtain the quantitative composition of fatty acids for each lipid class, the separated lipids were transesterified in 1% sulfuric acid/methanol at 100°C for 45 minutes and extracted by 0.05% butylated hydroxytoluene/hexane. The resulting fatty acid methyl esters were quantified by gas chromatography (Agilent Technologies model 6890) under nitrogen. The nmol% of each fatty acid was computed as the nmole quantity of the individual fatty acid divided by the total nmole amount of fatty acid isolated from each lipid class of each ER sample. The nmole% profile of fatty acids was then averaged in all six lean ER samples to examine the differences in the fatty acid profile that existed among different lipid classes. To identify compositional differences between control and experimental groups, Student's *t*-tests were performed for all fatty acid/lipid class combinations (26 x 9). The mean difference of nmol% for each fatty acid/lipid class combination with  $p < 0.05$  were visualized in MeV<sup>34</sup>. Complete cluster analyses were performed for the fatty acid compositions of control and experimental groups using the Cluster3.0 program<sup>33</sup> with the following filter setting: 100% present, at least 50% samples with nmole%  $\geq 2$  and (max-min)  $\geq 1$ .

## **Calcium transport assays**

The calcium transport assay for measuring Serca activity was adapted from Moore et al<sup>23</sup>. Briefly, fresh liver tissues were homogenized in 10 volumes of buffer containing 0.25M sucrose, 2mM Tris pH7.4 and 1mM DTT and EDTA-free protease inhibitor. The ER pellet was obtained after a series of centrifugation as described in the previous section, and then resuspended in 0.25M sucrose. The same procedure was employed to isolate microsomes from cultured Hepa1-6 cells except that cell pellet was lysed in hypotonic 0.1M sucrose, 2mM Tris pH7.4, 1mM DTT and EDTA-free protease inhibitor. The calcium transport assay was carried out in reaction buffer containing 0.1M KCl, 30mM, 5mM NaN<sub>3</sub>, 5mM MgCl<sub>2</sub>, 5mM K<sub>2</sub>C<sub>2</sub>O<sub>4</sub>, 50μM of CaCl<sub>2</sub> (plus 1μCi/μmol of <sup>45</sup>Ca), 1μM Rethenium Red, 5mM ATP. The reaction was started by the addition of microsomes containing 150μg proteins for 15 minutes in a 37°C water bath and stopped by the addition of 0.15M KCl, 1mM LaCl<sub>3</sub> and filtered through a 0.2μ HT Tuffryn membrane (PALL Corporation, NY). The calcium transport experiment with lipid overloading was carried out essentially as previously described<sup>5</sup> except that liposomes were made of egg derived PC and PE by the ethanol injection method<sup>36</sup>. The amount of SERCA independent calcium transport was quantified in the presence of 10μM thapsigargin and subtracted from the calculation.

## **Western blotting, real-time quantitative PCR and molecular cloning**

For the preparation of total cellular proteins, ~0.1g of liver tissues were homogenized in 1ml of a cold lysis buffer containing 50 mM Tris-HCl (pH 7.0), 2

mM EGTA, 5 mM EDTA, 30 mM NaF, 10 mM Na<sub>3</sub>VO<sub>4</sub>, 10 mM Na<sub>4</sub>P<sub>2</sub>O<sub>7</sub>, 40 mM β-glycerophosphate, 1% NP-40, and 1% protease inhibitor cocktail. After a brief centrifugation (200g x 10 minutes) to pellet down cell debris, 1/5 volume of 6x Laemmli buffer was added into the whole cell lysate, boiled and centrifuged at 10,000g for 10 minutes. Protein concentrations were quantified with Bio-Rad D<sub>c</sub> Protein Assay (Bio-Rad, CA). Western blotting of protein of interest was done as previously described<sup>4,10</sup>. Total RNA was extracted with Trizol reagent according to manufacturer's recommendations. A total of 2μg of RNA was used for cDNA synthesis using High Capacity cDNA archiving system (Applied Biosystems). The SYBR real-time PCR system was used to quantify the transcript abundance for genes of interest (Supplemental Table S6). Either 18S or 28S rRNA was used for internal control.

### **Adenovirus-mediated loss- or gain-of-function experiments**

For *Pemt* knockdown experiments, a series of DNA hairpins specifically targeting the mouse *Pemt* gene were designed by RNAs ( <http://rna.tbi.univie.ac.at/cgi-bin/RNAs>)<sup>37</sup>, synthesized, cloned into the **pENTR/U6** system (Invitrogen, CA) and tested in the Hepa1-6 cell line. The sequence with best efficacy, and it has 5nt mismatch with the next closest match of genes, were recloned into the **pAD/Block-iT-DEST** system through recombination, as described<sup>24</sup>. The *LacZ* shRNA was also cloned into the **pAD/Block-iT-DEST** system as control. For *Serca2b* over-expression experiment, the open reading frame of human *Serca2b* or *Gfp* (control) was amplified, cloned into **pENTR/TOPO** vector and then

recombined into the **pAD/CMV/V5-DEST** vector. Adenovirus (serotype 5, Ad5) for the construct of interest was produced and amplified in 293A cells, purified using CsCl column, desalted, and  $1 \times 10^{11}$  virus particles were used for each injection. Adenovirus transductions of mice were performed between 10-11 weeks of age. Blood glucose levels were measured after 6 hours of food withdrawal (9am-3pm) at before and 5 days post-injection and at the time of harvest (9-12 days). For histological analysis, liver tissues were fixed in 10% formalin solution, and sectioned for Hematoxylin and Eosin staining. All oligonucleotide sequences are listed in the Supplementary Table 6.

## SUPPLEMENTARY FIGURE LEGENDS

### **Supplementary Figure 1: ER fractionation and validation.**

**a**, Illustration of ER fractionation procedure for proteomic and lipidomic analyses and polysome profiling. **b**, Validation of ER fractionation methodology by immunoblot analyses of subcellular markers. PDI: protein disulfide isomerase, CANX: Calnexin, IR: Insulin receptor, H2A: Histone 2A. **c**, Volcano plot of the fold changes of median spectral counts of proteins from obese and lean samples against the significance of differential expression (log-normalized p-Values). Proteins of interest are highlighted (red:  $p < 0.05$ , fold of change (obese/lean)  $\geq 1.5$ , average spectral counts  $\geq 5$ ; green:  $p < 0.05$ , fold of change (lean/obese)  $\geq 1.5$ , average spectral counts  $\geq 5$ ). **d**, Immunoblot of differentially regulated proteins identified from the proteomic study for protein lysates prepared from cytosolic and ER fractions of unfasted lean and obese liver. PMSA: Proteasome small subunit a, RPS6: Ribosomal small subunit 6, APOB: Apolipoprotein B, Mtp: Microsomal triglyceride transfer protein, HP: Hepatoglobin, ASGR: Asialoglycoprotein receptor, mEH: Microsomal epoxide hydrolase, MRC1: Mannose receptor, C type 1.

### **Supplementary Figure 2: Expression of ER stress markers in the obese liver.**

**a**, Immunoblot detection of representative ER stress markers in total protein lysates prepared from the liver of lean and ob/ob mice sacrificed at 12 weeks of age after 6 hours of food withdrawal. **b**, Transcript levels of genes involved in

ER-associated protein degradation (ERAD) in the liver of lean and ob/ob mice as determined by quantitative RT-PCR.

**Supplementary Figure 3: Distinct contributions of dietary fat and *de novo* lipogenesis to ER lipid composition.**

**a**, Illustration of the synthesis of nine classes of lipids detected in the ER lipidome. Dashed lines indicate multiple enzymatic steps. Genes studied herein are colored red. **b**, Heatmap display of all significant ( $p < 0.05$ , Student's *t*-test) alterations present between diet and lean ER lipidomes. The color scheme reflects differences calculated based on the relative abundance (nmol%) of each fatty acid among individual lipid groups detected in the ER of lean liver and the diet. **c**, Complete linkage analysis of all twelve ER lipidomes (6 lean vs 6 obese). The length of each branch correlates with the magnitude of lipidomic differences.

**Supplementary Figure 4: The effect of *Pemt* knockdown on liver ER lipidome and ER stress in ob/ob mice.**

**a**, Transcript levels of *Pemt* in the liver of ob/ob mice administered with adenoviral control (*LacZ* shRNA) or *Pemt* shRNA expressing viruses. **b**, Heatmap display of the fatty acid composition of ER isolated from the liver of ob/ob mice administered with control and *Pemt* shRNA. The color scheme denotes differences calculated from the relative abundance (nmol%) of each fatty acid among individual lipid groups detected in the ER of control and *Pemt* shRNA liver samples. **c**, Complete linkage analysis of ER lipidome for samples prepared from control and experimental groups. **d**, Quantification of immunoblot signals

presented in Figure 3d. Values are mean±SEM, n=4, “\*” denotes  $p<0.05$ , Student’s *t*-test.

**Supplementary Figure 5: Amelioration of ER stress in the liver of high-fat diet (HFD) induced obese mouse by *Pemt* knockdown.**

**a-b**, Hematoxylin & Eosin staining of liver sections prepared from control (**a**) as well as *Pemt* shRNA-treated mice after 22 weeks of HFD (**b**). The white vesicles represent lipid droplets. **c**, Blood glucose levels of control and *Pemt* shRNA-treated HFD mice. **d-e**, Immunoblot and quantification of ER stress markers in the liver of control and experimental HFD mice. Values are mean±SEM, n=4, “\*” denotes  $p<0.05$ , Student’s *t*-test.

**Supplementary Figure 6: SERCA2b overexpression improves systematic glucose homeostasis of *ob/ob* mice.**

Plasma glucose levels of control and SERCA2b overexpressing *ob/ob* mice after intraperitoneal administration of either 1IU/kg of insulin (**a**) or 1g/kg of glucose (**b**). All data are mean±SEM, “\*” denotes  $p<0.05$  (one-way ANOVA, n=6/group).

**Supplementary Figure 7: Detergent-dependent solubilization of SERCA2b proteins from fatty liver samples and comparison of SERCA2b expression in lean and obese animals.**

**a**, Immunoblot of total protein lysates as well as ER fractions prepared from the liver of lean and obese mice following two different solubilization methods from the same samples. Liver tissue was first homogenized in lysis buffer containing



1% NP40 and clarified at 200g for 10 minutes to pellet down cell debris. The whole cell lysate was either further solubilized by the addition of Laemmli buffer (2% SDS, top panel) or clarified by consecutive centrifugations at 16,000g for 10 minutes and 60 minutes (middle panel) as described in Park et al., (2010)<sup>16</sup>, supernatant collected, boiled in Laemmli buffer and loaded on to SDS-PAGE. For the examination of SERCA2b protein levels in the liver ER (bottom panel), ER pellet was resuspended in Laemmli buffer (2% SDS), sonicated for 3 minutes, boiled and clarified by centrifugation at 10,000g for 10 minutes. **b-c**, Transcript levels of *Serca2b* in the liver tissues of genetically obese (12 weeks old, **b**) and diet-induced obese (22 weeks of HFD) mice as compared to age-matched lean controls. **d-e**, SERCA2b protein levels in the liver tissues of genetically obese as well as diet-induced obese mice at different ages. The total protein lysates were prepared with Laemmli buffer containing 2% SDS as described in the Methods.

## SUPPLEMENTAL REFERENCES

25. Schmidt, M. W., Houseman, A., Ivanov, A. R., and Wolf, D. A., Comparative proteomic and transcriptomic profiling of the fission yeast *Schizosaccharomyces pombe*. *Mol Syst Biol* **3**, 79 (2007).
26. Liu, H., Sadygov, R. G., and Yates, J. R., 3rd, A model for random sampling and estimation of relative protein abundance in shotgun proteomics. *Anal Chem* **76** (14), 4193 (2004).
27. Ishihama, Y. et al., Exponentially modified protein abundance index (emPAI) for estimation of absolute protein amount in proteomics by the number of sequenced peptides per protein. *Mol Cell Proteomics* **4** (9), 1265 (2005).
28. Lu, P. et al., Absolute protein expression profiling estimates the relative contributions of transcriptional and translational regulation. *Nat Biotechnol* **25** (1), 117 (2007).
29. Diggle, P. J., Heagerty, P., Liang, K.-Y., and Zeger, S. L. , in *Analysis of Longitudinal Data*. (Oxford Press, 2002).
30. Choi, H., Fermin, D., and Nesvizhskii, A. I., Significance analysis of spectral count data in label-free shotgun proteomics. *Mol Cell Proteomics* **7** (12), 2373 (2008).
31. Dennis, G., Jr. et al., DAVID: Database for Annotation, Visualization, and Integrated Discovery. *Genome Biol* **4** (5), P3 (2003).
32. Huang, D.W., Sherman, B. T., and Lempicki, R. A., Systematic and integrative analysis of large gene lists using DAVID bioinformatics resources. *Nat Protoc* **4** (1), 44 (2009).
33. Eisen, M. B., Spellman, P. T., Brown, P. O., and Botstein, D., Cluster analysis and display of genome-wide expression patterns. *Proc Natl Acad Sci U S A* **95** (25), 14863 (1998).
34. Saeed, A. I. et al., TM4 microarray software suite. *Methods Enzymol* **411**, 134 (2006).
35. Folch, J., Lees, M., and Sloane Stanley, G. H., A simple method for the isolation and purification of total lipides from animal tissues. *J Biol Chem* **226** (1), 497 (1957).

36. Watanabe, J., Asaka, Y., Mino, K., and Kanamura, S., Preparation of liposomes that mimic the membrane of endoplasmic reticulum of rat hepatocytes. *J Electron Microsc (Tokyo)* **45** (2), 171 (1996).
37. Tafer, H. et al., The impact of target site accessibility on the design of effective siRNAs. *Nat Biotechnol* **26** (5), 578 (2008).

**a**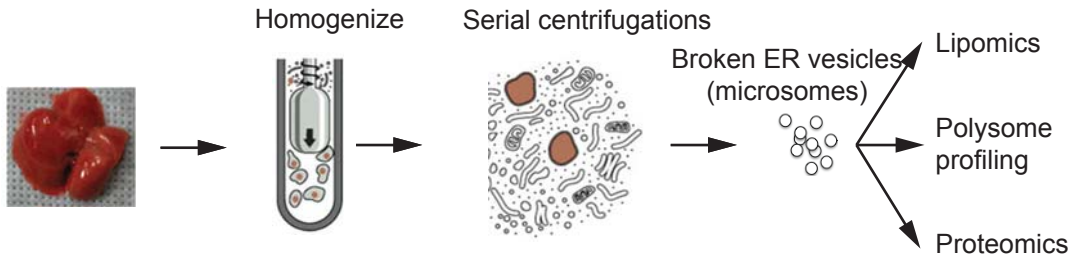**b**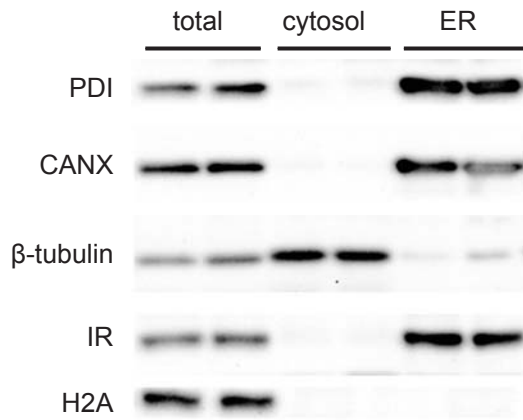**c**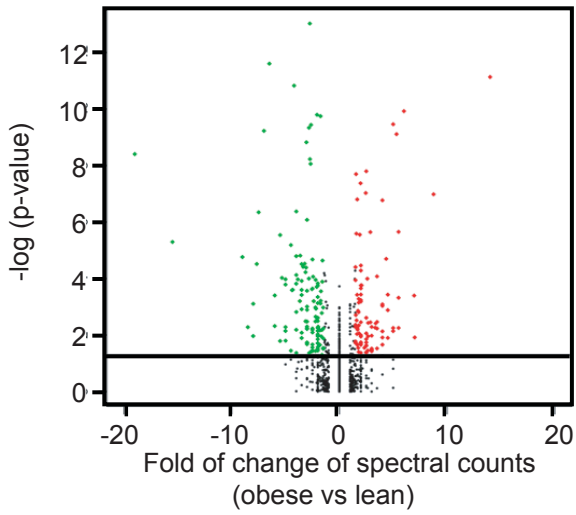**d**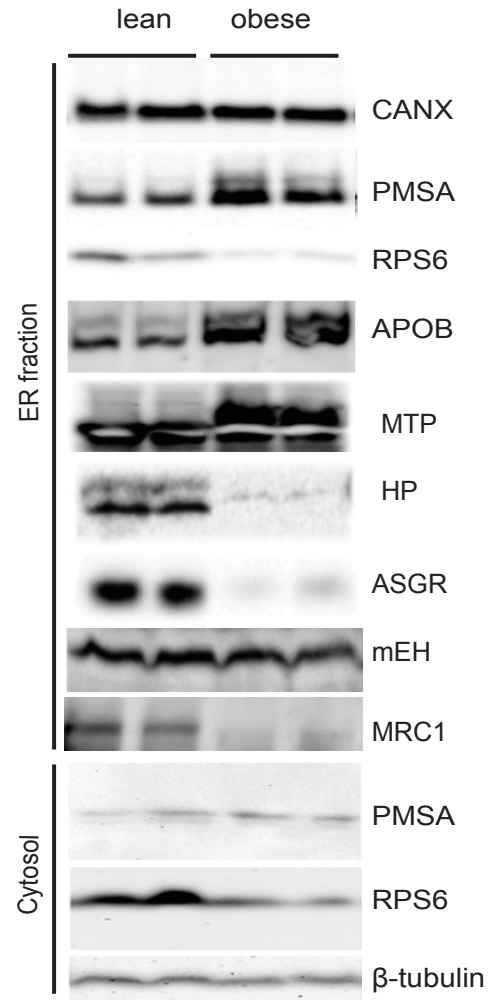

Supplementary Figure 1

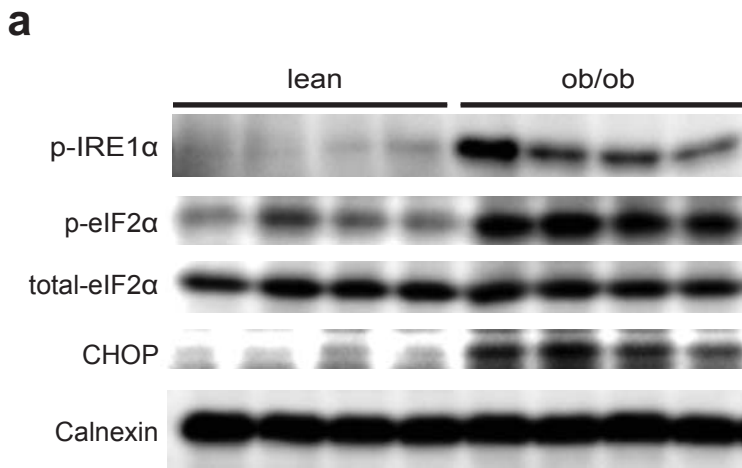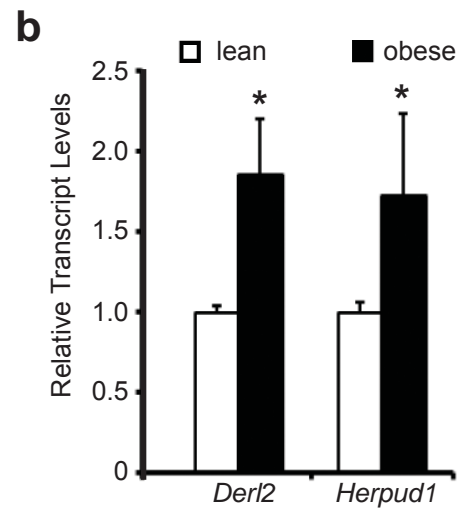

Supplementary Figure 2



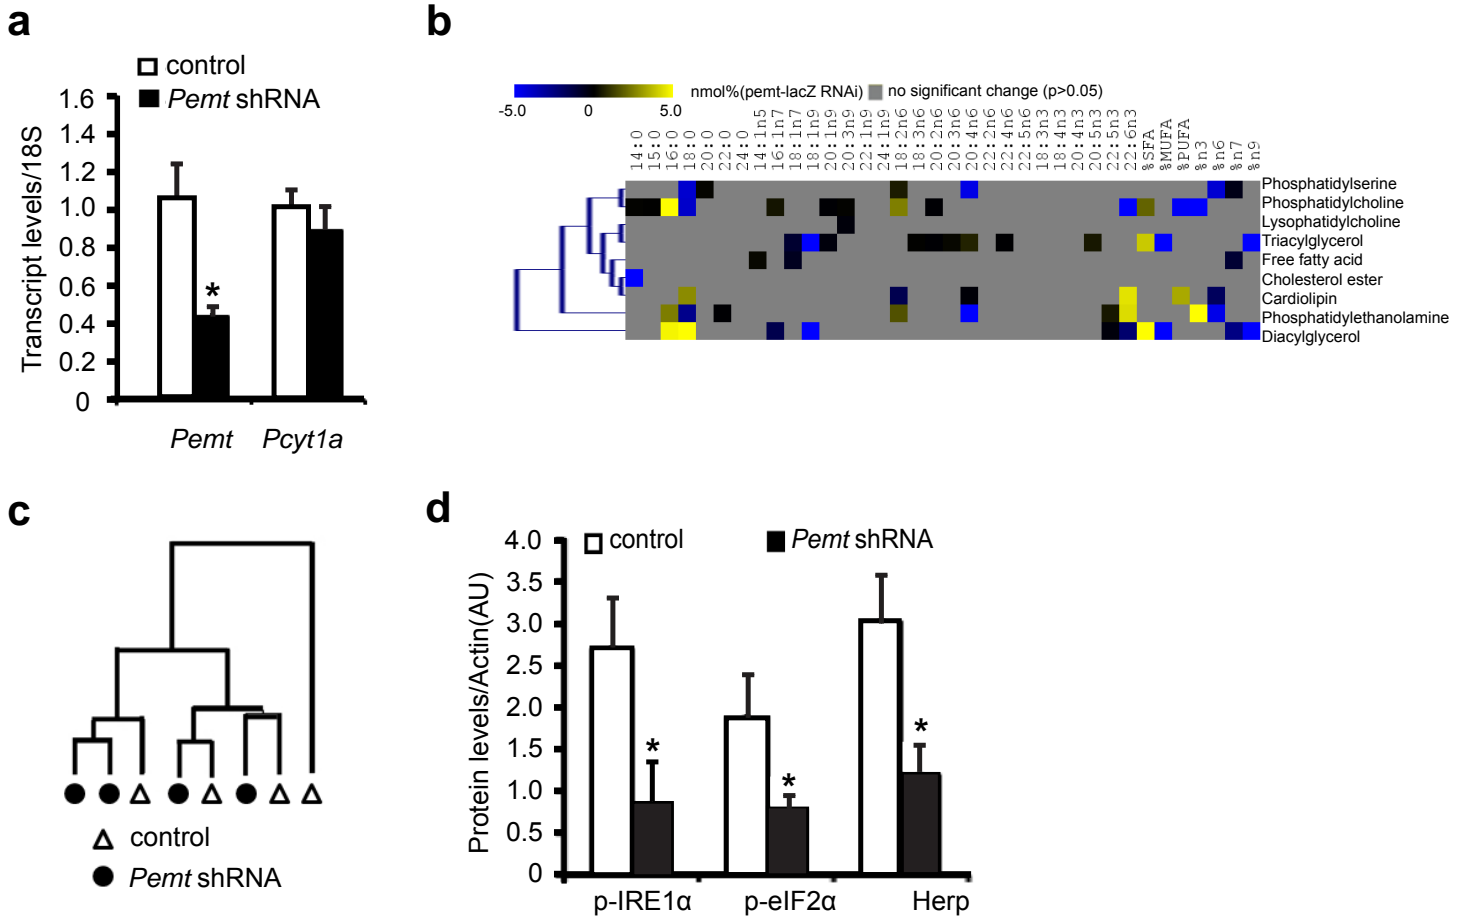

Supplementary Figure 4

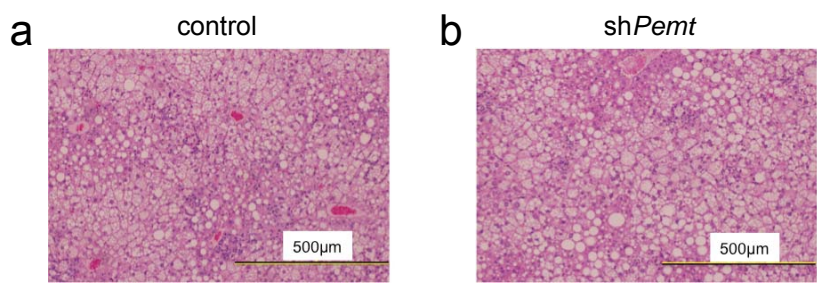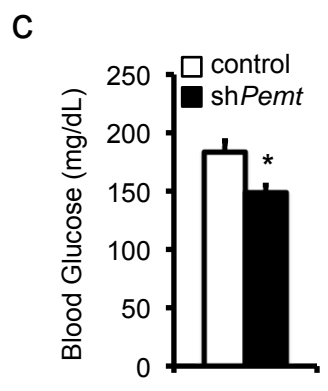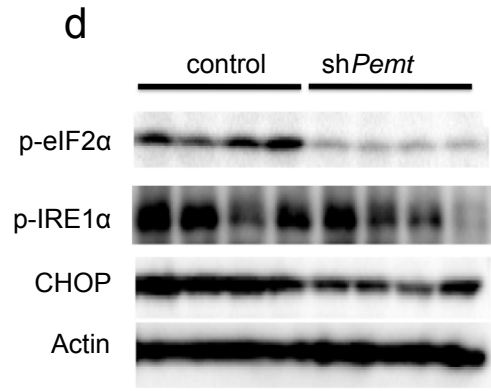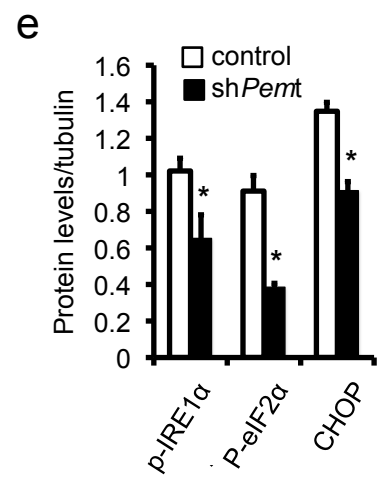

Supplementary Figure 5



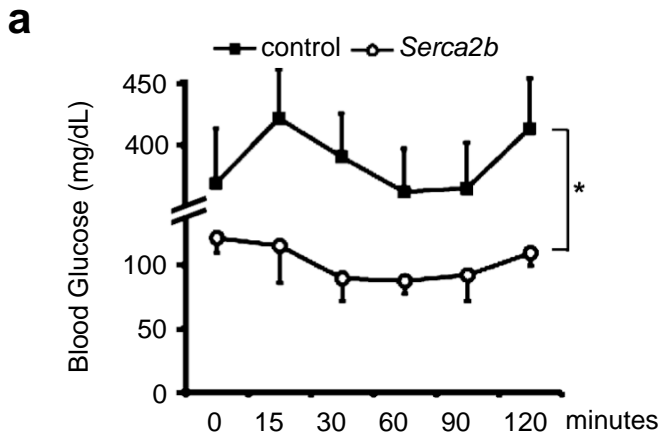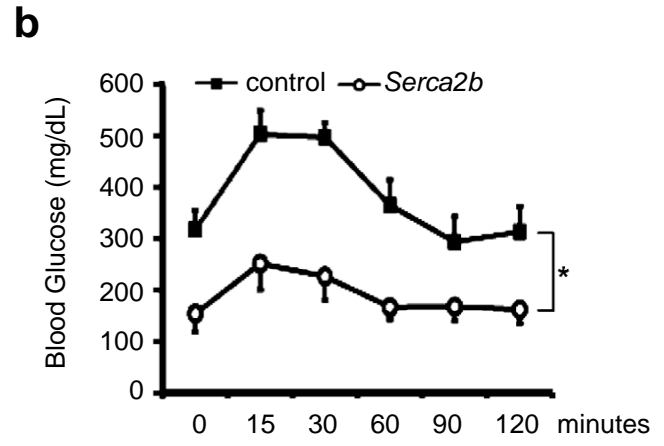

Supplementary Figure 6

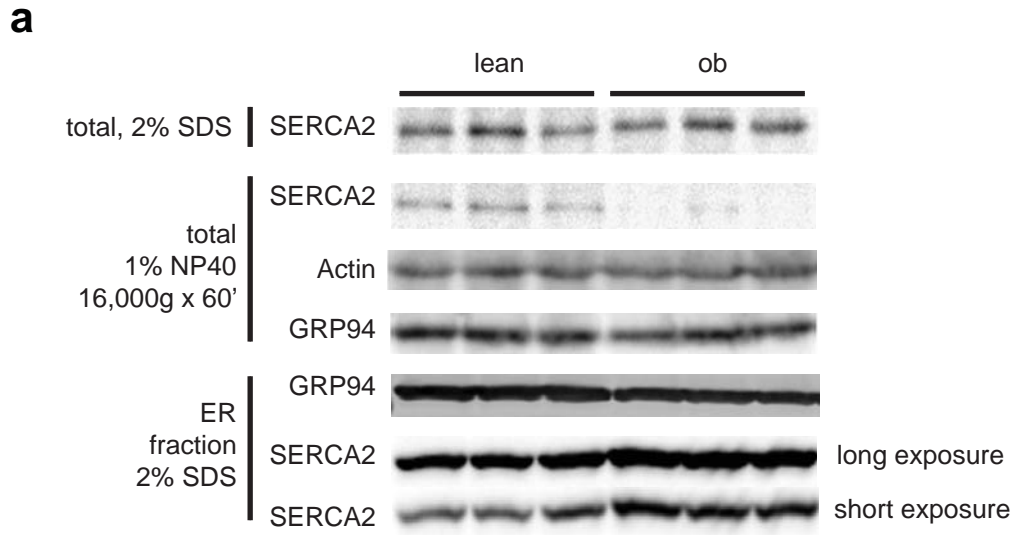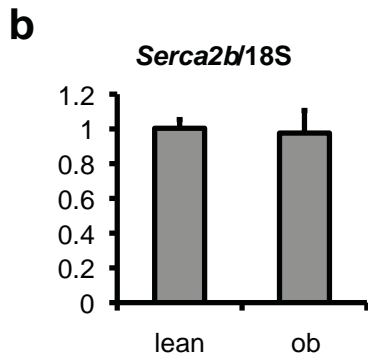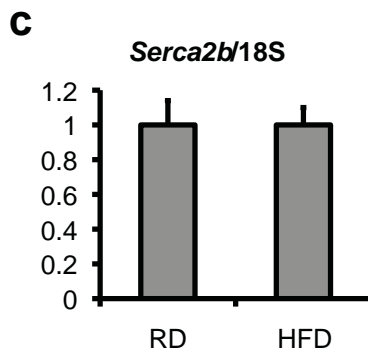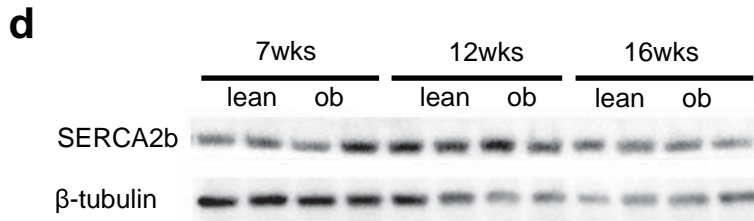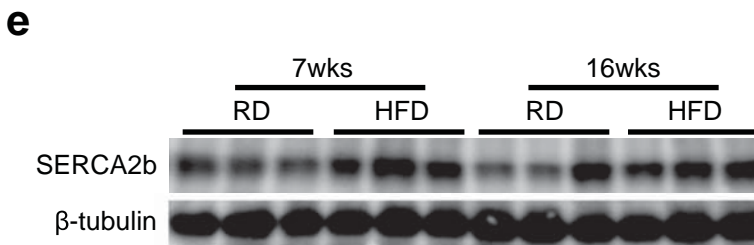

Supplementary Figure 7

Supplementary Table 2a. The Up-regulated Proteins in the Obese Liver ER Proteome.

| Symbol  | UniProt Accession   | MW(kDa) | Nomenclature                                                                                | Fold Change | p_val    |
|---------|---------------------|---------|---------------------------------------------------------------------------------------------|-------------|----------|
| Acaa1b  | Q8VCH0 THIKB_MOUSE  | 44      | acetyl-Coenzyme A acyltransferase 1B                                                        | 14.0        | 7.37E-12 |
| Fasn    | P19096 FAS_MOUSE    | 272     | fatty acid synthase                                                                         | 8.8         | 1.04E-07 |
| Oplah   | Q8K010 OPLA_MOUSE   | 138     | 5-oxoprolinase (ATP-hydrolysing)                                                            | 7.0         | 1.21E-02 |
| Pcx     | Q3T9S7 Q3T9S7_MOUSE | 130     | pyruvate carboxylase                                                                        | 7.0         | 4.00E-04 |
| Apoa4   | P06728 APOA4_MOUSE  | 45      | apolipoprotein A-IV                                                                         | 6.0         | 1.19E-10 |
| Pklr    | P53657 KPYP_MOUSE   | 62      | pyruvate kinase liver and red blood cell                                                    | 5.5         | 2.22E-06 |
| Aldh3a2 | Q5SRE0 Q5SRE0_MOUSE | 59      | aldehyde dehydrogenase family 3, subfamily A2                                               | 5.3         | 7.74E-10 |
| Tuba1a  | P68369 TBA1A_MOUSE  | 50      | tubulin, alpha 1A                                                                           | 5.0         | 7.22E-03 |
| Tubb2b  | Q9CWF2 TBB2B_MOUSE  | 50      | tubulin, beta 2B                                                                            | 5.0         | 3.46E-10 |
| Gpd1    | P13707 GPDA_MOUSE   | 38      | glycerol-3-phosphate dehydrogenase 1 (soluble)                                              | 4.5         | 3.71E-04 |
| Acaca   | Q5SWU9 COA1_MOUSE   | 265     | acetyl-Coenzyme A carboxylase alpha                                                         | 4.3         | 2.01E-05 |
| Psmd1   | Q3TXS7 PSMD1_MOUSE  | 106     | proteasome (prosome, macropain) 26S subunit, non-ATPase, 1                                  | 4.0         | 2.19E-02 |
| Myh14   | Q6URW6 MYH14_MOUSE  | 229     | myosin, heavy polypeptide 14                                                                | 4.0         | 9.25E-04 |
| Eno1    | P17182 ENOA_MOUSE   | 47      | enolase 1, alpha non-neuron                                                                 | 4.0         | 1.70E-07 |
| Mylic2b | Q3THE2 MLRB_MOUSE   | 20      | myosin, light chain 12B, regulatory                                                         | 3.4         | 3.83E-03 |
| Ugp2    | Q91ZJ5 UGPA_MOUSE   | 57      | UDP-glucose pyrophosphorylase 2                                                             | 3.3         | 5.47E-03 |
| Coasy   | Q9DBL7 COASY_MOUSE  | 62      | Coenzyme A synthase                                                                         | 3.0         | 1.05E-02 |
| Ces3    | Q8VCT4 CES3_MOUSE   | 62      | carboxylesterase 3                                                                          | 2.9         | 3.53E-03 |
| Gstm1   | A2AE89 A2AE89_MOUSE | 24      | glutathione S-transferase, mu 1                                                             | 2.9         | 2.27E-06 |
| Pygl    | Q9ET01 PYGL_MOUSE   | 97      | liver glycogen phosphorylase                                                                | 2.7         | 3.69E-03 |
| Hbb-b1  | A8DUK7 A8DUK7_MOUSE | 16      | hemoglobin, beta adult major chain                                                          | 2.6         | 3.52E-02 |
| Dak     | Q8VC30 DAK_MOUSE    | 60      | dihydroxyacetone kinase 2 homolog (yeast)                                                   | 2.6         | 1.01E-04 |
| Fmo1    | P50285 FMO1_MOUSE   | 60      | flavin containing monooxygenase 1                                                           | 2.5         | 1.39E-02 |
| Aldob   | Q91Y97 ALDOB_MOUSE  | 40      | aldolase B, fructose-bisphosphate                                                           | 2.5         | 9.39E-08 |
| Cat     | P24270 CATA_MOUSE   | 60      | catalase                                                                                    | 2.3         | 2.81E-02 |
| P4hb    | P09103 PDI1A_MOUSE  | 57      | prolyl 4-hydroxylase, beta polypeptide                                                      | 2.1         | 1.73E-04 |
| Sds     | Q8VBT2 SDHL_MOUSE   | 35      | serine dehydratase                                                                          | 2.0         | 1.79E-02 |
| Gstz1   | Q9JJA0 Q9JJA0_MOUSE | 16      | glutathione transferase zeta 1 (maleylacetoacetate isomerase)                               | 2.0         | 3.45E-05 |
| Ephx1   | P97869 P97869_MOUSE | 53      | epoxide hydrolase 1, microsomal                                                             | 2.0         | 4.24E-08 |
| Maob    | Q8BW75 AOFB_MOUSE   | 59      | monoamine oxidase B                                                                         | 1.9         | 2.80E-06 |
| Cyb5r3  | Q9CY59 Q9CY59_MOUSE | 34      | cytochrome b5 reductase 3                                                                   | 1.8         | 8.66E-03 |
| Trf     | Q92111 TRFE_MOUSE   | 77      | transferrin                                                                                 | 1.8         | 4.52E-03 |
| Cyb5    | P56395 CYB5_MOUSE   | 15      | cytochrome b-5                                                                              | 1.8         | 3.97E-02 |
| Acsl5   | Q8JZR0 ACSL5_MOUSE  | 76      | acyl-CoA synthetase long-chain family member 5                                              | 1.8         | 1.55E-03 |
| Phb     | P67778 PHB_MOUSE    | 30      | prohibitin                                                                                  | 1.8         | 2.86E-02 |
| Aldh1a1 | P24549 AL1A1_MOUSE  | 54      | aldehyde dehydrogenase family 1, subfamily A1                                               | 1.7         | 1.38E-03 |
| Slc25a5 | P51881 ADT2_MOUSE   | 33      | solute carrier family 25 (mitochondrial carrier, adenine nucleotide translocator), member 5 | 1.7         | 6.42E-03 |
| Atp5h   | Q9DCX2 ATP5H_MOUSE  | 19      | ATP synthase, H+ transporting, mitochondrial F0 complex, subunit d                          | 1.7         | 2.23E-02 |
| Mttp    | O08601 MTP_MOUSE    | 99      | microsomal triglyceride transfer protein                                                    | 1.7         | 5.71E-03 |
| Atp5a1  | Q03265 ATPA_MOUSE   | 60      | ATP synthase, H+ transporting, mitochondrial F1 complex, alpha subunit, isoform 1           | 1.7         | 1.58E-07 |
| Fmo5    | P97872 FMO5_MOUSE   | 60      | flavin containing monooxygenase 5                                                           | 1.7         | 3.75E-04 |
| Atp5o   | Q9DB20 ATPO_MOUSE   | 23      | ATP synthase, H+ transporting, mitochondrial F1 complex, O subunit                          | 1.6         | 9.15E-03 |
| Etfhd   | Q6PF96 Q6PF96_MOUSE | 61      | electron transferring flavoprotein, dehydrogenase                                           | 1.6         | 3.01E-03 |
| Mvp     | Q3THX5 Q3THX5_MOUSE | 97      | major vault protein                                                                         | 1.6         | 2.57E-06 |
| ApoE    | P08226 APOE_MOUSE   | 36      | apolipoprotein E                                                                            | 1.6         | 2.01E-08 |
| Mat1a   | Q91X83 METK1_MOUSE  | 44      | methionine adenosyltransferase I, alpha                                                     | 1.5         | 1.95E-03 |
| Gapdh   | P16858 G3P_MOUSE    | 36      | glyceraldehyde-3-phosphate dehydrogenase                                                    | 1.5         | 1.90E-02 |
| Rps13   | P62301 RS13_MOUSE   | 17      | ribosomal protein S13                                                                       | 1.5         | 1.67E-02 |
| Flnb    | Q80X90 FLNB_MOUSE   | 278     | filamin, beta                                                                               | 1.5         | 4.31E-03 |
| Myi6    | Q60605 MYL6_MOUSE   | 17      | myosin, light polypeptide 6, alkali, smooth muscle and non-muscle                           | 1.5         | 5.16E-03 |

Supplementary Table 2b. The Down-regulated Proteins in the Obese Liver ER Proteome.

| Symbol  | UniProt Accession   | MW(kDa) | Nomenclature                                                                     | Fold Change | p.val    |
|---------|---------------------|---------|----------------------------------------------------------------------------------|-------------|----------|
| Gne     | A2AJ63 A2AJ63_MOUSE | 11      | glucosamine                                                                      | -19.0       | 3.92E-09 |
| Eif3f   | Q9DCH4 EIF3F_MOUSE  | 38      | eukaryotic translation initiation factor 3, subunit F                            | -15.5       | 5.07E-06 |
| Eif2s2  | Q99L45 IF2B_MOUSE   | 38      | eukaryotic translation initiation factor 2, subunit 2 (beta)                     | -8.5        | 5.25E-03 |
| Eef1g   | Q9D8N0 EF1G_MOUSE   | 50      | eukaryotic translation elongation factor 1 gamma                                 | -8.0        | 1.08E-02 |
| Eif3g   | Q9Z1D1 EIF3G_MOUSE  | 36      | eukaryotic translation initiation factor 3, subunit G                            | -8.0        | 7.80E-04 |
| Eif2s3x | A2AAW9 A2AAW9_MOUSE | 37      | eukaryotic translation initiation factor 2, subunit 3, structural gene X-linked  | -7.7        | 3.06E-05 |
| Egfr    | Q01279 EGFR_MOUSE   | 135     | epidermal growth factor receptor                                                 | -6.5        | 2.48E-12 |
| Tdo2    | P48776 T23O_MOUSE   | 48      | tryptophan 2,3-dioxygenase                                                       | -6.0        | 3.96E-04 |
| Pfkfb1  | P70266 F261_MOUSE   | 55      | 6-phosphofructo-2-kinase/fructose-2,6-biphosphatase 1                            | -6.0        | 4.79E-03 |
| Sept9   | A2A6U3 A2A6U3_MOUSE | 64      | septin 9                                                                         | -5.5        | 1.62E-02 |
| Eif3e   | P60229 EIF3E_MOUSE  | 52      | eukaryotic translation initiation factor 3, subunit E                            | -5.3        | 9.44E-05 |
| Eif3m   | Q3TI04 Q3TI04_MOUSE | 43      | eukaryotic translation initiation factor 3, subunit M                            | -5.0        | 1.63E-04 |
| Prps1   | Q3TI27 Q3TI27_MOUSE | 35      | phosphoribosyl pyrophosphate synthetase 1                                        | -4.5        | 3.57E-02 |
| Mrc1    | Q61830 MRC1_MOUSE   | 165     | mannose receptor, C type 1                                                       | -4.4        | 2.57E-04 |
| Atp11c  | Q9QZW0 AT11C_MOUSE  | 129     | ATPase, class VI, type 11C                                                       | -4.2        | 1.49E-11 |
| Gcn111  | Q3U3Z4 Q3U3Z4_MOUSE | 118     | GCN1 general control of amino-acid synthesis 1-like 1 (yeast)                    | -4.0        | 1.52E-03 |
| Eif2s1  | Q6ZWX6 IF2A_MOUSE   | 36      | eukaryotic translation initiation factor 2, subunit 1 alpha                      | -3.9        | 1.07E-04 |
| Eif4b   | Q8BGD9 IF4B_MOUSE   | 69      | eukaryotic translation initiation factor 4B                                      | -3.7        | 6.28E-04 |
| Gstp1   | P19157 GSTP1_MOUSE  | 24      | glutathione S-transferase, pi 1                                                  | -3.6        | 1.54E-05 |
| Eif3c   | Q8R1B4 EIF3C_MOUSE  | 106     | eukaryotic translation initiation factor 3, subunit C                            | -3.4        | 3.84E-05 |
| Dnm2    | P39054 DYN2_MOUSE   | 98      | dynamitin 2                                                                      | -3.2        | 2.97E-05 |
| Eif3h   | Q8BMZ8 Q8BMZ8_MOUSE | 7       | eukaryotic translation initiation factor 3, subunit H                            | -3.1        | 5.95E-05 |
| Eif3i   | Q9QZD9 EIF3I_MOUSE  | 36      | eukaryotic translation initiation factor 3, subunit I                            | -3.1        | 3.24E-03 |
| Eif3d   | O70194 EIF3D_MOUSE  | 64      | eukaryotic translation initiation factor 3, subunit D                            | -3.1        | 4.08E-05 |
| Eif3b   | Q8CIJ3 Q8CIJ3_MOUSE | 109     | eukaryotic translation initiation factor 3, subunit B                            | -3.1        | 1.50E-09 |
| Actr1b  | Q8R5C5 ACTY_MOUSE   | 42      | ARP1 actin-related protein 1 homolog B, centractin beta (yeast)                  | -3.0        | 1.89E-02 |
| Cad     | Q6P9L1 Q6P9L1_MOUSE | 158     | carbamoyl-phosphate synthetase 2, aspartate transcarbamylase, and dihydroorotase | -3.0        | 9.82E-04 |
| Abce1   | P61222 ABCE1_MOUSE  | 67      | ATP-binding cassette, sub-family E (OABP), member 1                              | -2.8        | 1.00E-04 |
| Eif3eip | Q8QZY1 IF3EI_MOUSE  | 67      | eukaryotic translation initiation factor 3, subunit L                            | -2.8        | 4.61E-10 |
| Lman1   | Q3U944 Q3U944_MOUSE | 61      | lectin, mannose-binding, 1                                                       | -2.8        | 4.30E-02 |
| Asgr1   | P34927 ASGR1_MOUSE  | 33      | asialoglycoprotein receptor 1                                                    | -2.7        | 9.43E-14 |
| Lrp1    | Q91ZX7 LRP1_MOUSE   | 505     | low density lipoprotein receptor-related protein 1                               | -2.7        | 5.92E-09 |
| Usp9x   | A2AD18 A2AD18_MOUSE | 291     | ubiquitin specific peptidase 9, X chromosome                                     | -2.7        | 3.96E-02 |
| Eif3a   | P23116 EIF3A_MOUSE  | 162     | eukaryotic translation initiation factor 3, subunit A                            | -2.7        | 8.68E-09 |
| Scamp3  | Q3TDM8 Q3TDM8_MOUSE | 35      | secretory carrier membrane protein 3                                             | -2.6        | 3.64E-10 |
| Rps8    | P62242 RS8_MOUSE    | 24      | ribosomal protein S8                                                             | -2.5        | 2.38E-04 |
| Cyp2c50 | Q91X77 CY250_MOUSE  | 56      | cytochrome P450, family 2, subfamily c, polypeptide 50                           | -2.5        | 6.51E-03 |
| Rrbp1   | A2AVJ7 A2AVJ7_MOUSE | 158     | ribosome binding protein 1                                                       | -2.5        | 5.84E-03 |
| Eif3j   | Q3UGC7 Q3UGC7_MOUSE | 29      | eukaryotic translation initiation factor 3, subunit J                            | -2.4        | 8.60E-05 |
| Hpx     | Q3UKP2 Q3UKP2_MOUSE | 51      | hemopexin                                                                        | -2.4        | 6.30E-04 |
| At12    | Q6PA06 ATLA2_MOUSE  | 66      | atlastin GTPase 2                                                                | -2.2        | 3.28E-03 |
| Cyp2d9  | P11714 CP2D9_MOUSE  | 57      | cytochrome P450, family 2, subfamily d, polypeptide 9                            | -2.2        | 3.68E-02 |
| Copb1   | Q9JIF7 COPB_MOUSE   | 107     | coatamer protein complex, subunit beta 1                                         | -2.2        | 1.05E-03 |
| Vps26a  | P40336 VP26A_MOUSE  | 38      | vacuolar protein sorting 26 homolog A (yeast)                                    | -2.2        | 1.11E-04 |
| Ccdc22  | Q9JIG7 CCD22_MOUSE  | 71      | coiled-coil domain containing 22                                                 | -2.2        | 2.23E-03 |
| Ugt2b1  | Q8R084 Q8R084_MOUSE | 60      | UDP glucuronosyltransferase 2 family, polypeptide B1                             | -2.2        | 1.16E-03 |
| Copa    | Q8BTF0 Q8BTF0_MOUSE | 139     | coatamer protein complex subunit alpha                                           | -2.1        | 1.98E-04 |
| Pigr    | O70570 PIGR_MOUSE   | 85      | polymeric immunoglobulin receptor                                                | -2.1        | 1.60E-10 |
| Cyp1a2  | P00186 CP1A2_MOUSE  | 58      | cytochrome P450, family 1, subfamily a, polypeptide 2                            | -2.1        | 2.53E-03 |
| Cct3    | P80318 TCPG_MOUSE   | 61      | chaperonin containing Tcp1, subunit 3 (gamma)                                    | -2.0        | 1.96E-02 |
| Gnb2l1  | P68040 GBLP_MOUSE   | 35      | guanine nucleotide binding protein (G protein), beta polypeptide 2 like 1        | -2.0        | 1.41E-02 |
| Dpp4    | P28843 DPP4_MOUSE   | 87      | dipeptidylpeptidase 4                                                            | -2.0        | 5.62E-03 |
| Mup12   | A2CEK7 A2CEK7_MOUSE | 21      | major urinary protein 12                                                         | -2.0        | 1.01E-02 |
| Hp      | Q61646 HPT_MOUSE    | 39      | haptoglobin                                                                      | -2.0        | 4.50E-04 |
| M6pr    | P24668 MPRD_MOUSE   | 31      | mannose-6-phosphate receptor, cation dependent                                   | -2.0        | 3.18E-03 |
| Ap1m1   | P35585 AP1M1_MOUSE  | 49      | adaptor-related protein complex AP-1, mu subunit 1                               | -2.0        | 2.44E-03 |
| Eif4a1  | P60843 IF4A1_MOUSE  | 46      | eukaryotic translation initiation factor 4A1                                     | -2.0        | 5.05E-03 |
| Abca6   | Q8K441 ABCA6_MOUSE  | 183     | ATP-binding cassette, sub-family A (ABC1), member 6                              | -1.8        | 6.82E-03 |
| Anxa11  | P97384 ANX11_MOUSE  | 54      | annexin A11                                                                      | -1.8        | 2.23E-02 |
| Igf2r   | Q07113 MPRI_MOUSE   | 274     | insulin-like growth factor 2 receptor                                            | -1.8        | 7.61E-04 |
| Cpne3   | Q8BT60 CPNE3_MOUSE  | 60      | copine III                                                                       | -1.8        | 1.79E-10 |
| Vps35   | Q9EQH3 VPS35_MOUSE  | 92      | vacuolar protein sorting 35                                                      | -1.7        | 6.09E-04 |
| Clint1  | Q3UGL3 Q3UGL3_MOUSE | 68      | clathrin interactor 1                                                            | -1.7        | 2.82E-04 |
| Cope    | O89079 COPE_MOUSE   | 35      | coatamer protein complex, subunit epsilon                                        | -1.7        | 1.11E-02 |
| Dnaj1   | P63037 DNJA1_MOUSE  | 45      | Dnaj (Hsp40) homolog, subfamily A, member 1                                      | -1.6        | 1.66E-03 |
| Rps6    | P62754 RS6_MOUSE    | 29      | ribosomal protein S6                                                             | -1.6        | 1.29E-04 |
| Rdh7    | O88451 RDH7_MOUSE   | 36      | retinol dehydrogenase 7                                                          | -1.6        | 2.30E-05 |
| Arcn1   | Q3U4S9 Q3U4S9_MOUSE | 57      | archain 1                                                                        | -1.5        | 2.85E-02 |
| Aadac   | Q99PG0 AAAD_MOUSE   | 45      | arylacetamide deacetylase (esterase)                                             | -1.5        | 2.90E-02 |
| Ugt2b5  | P17717 UD2B5_MOUSE  | 61      | UDP glucuronosyltransferase 2 family, polypeptide B5                             | -1.5        | 5.89E-03 |

Supplementary Table 3. Lipid Composition of Endoplasmic Reticulum Prepared from Obese and Lean Mouse Liver Tissues

| Lipid Class(mmol%)       | ob#1   | ob#2   | ob#3   | ob#4   | ob#5   | ob#6   | lean#1 | lean#2 | lean#3 | lean#4 | lean#5 | lean#6 | diet#1 | diet#2 | ob.ave | lean.ave | TTEST        |
|--------------------------|--------|--------|--------|--------|--------|--------|--------|--------|--------|--------|--------|--------|--------|--------|--------|----------|--------------|
| Cholesterol Ester        | 4.071  | 8.442  | 1.183  | 1.691  | 2.442  | 1.381  | 1.488  | 3.490  | 6.031  | 5.883  | 4.367  | 1.354  | 0.010  | 0.010  | 3.201  | 3.769    | 0.696        |
| Diacylglycerol           | 5.617  | 3.476  | 1.982  | 3.470  | 4.269  | 1.968  | 1.454  | 2.557  | 3.577  | 4.269  | 1.442  | 2.468  | 0.038  | 0.037  | 3.464  | 2.628    | 0.281        |
| Free cholesterol         | 17.245 | 18.869 | 10.058 | 15.920 | 21.385 | 7.233  | 9.494  | 9.155  | 13.603 | 18.338 | 11.266 | 9.528  | 0.118  | 0.121  | 15.118 | 11.897   | 0.251        |
| Free fatty acid          | 8.286  | 10.921 | 5.763  | 10.017 | 5.356  | 8.776  | 5.295  | 8.452  | 20.915 | 12.701 | 6.277  | 7.163  | 0.006  | 0.005  | 8.187  | 10.133   | 0.466        |
| Triacylglycerol          | 12.320 | 9.442  | 11.248 | 6.651  | 11.386 | 9.335  | 9.986  | 10.135 | 5.945  | 7.998  | 9.592  | 11.400 | 0.733  | 0.732  | 10.064 | 9.176    | 0.456        |
| Phospholipids            | 52.461 | 48.849 | 69.767 | 62.251 | 55.161 | 71.308 | 72.283 | 66.212 | 49.930 | 50.813 | 67.056 | 68.065 | 0.095  | 0.095  | 59.966 | 62.393   | 0.665        |
| Cardiolipin              | 4.994  | 3.331  | 2.680  | 2.974  | 3.263  | 2.711  | 4.543  | 3.237  | 4.469  | 3.471  | 3.590  | 3.779  | 0.032  | 0.031  | 3.326  | 3.848    | 0.237        |
| Lysophosphatidylcholine  | 3.272  | 4.599  | 1.776  | 3.366  | 3.960  | 2.014  | 2.923  | 1.488  | 3.953  | 6.940  | 2.102  | 1.529  | 0.011  | 0.011  | 3.164  | 3.156    | 0.993        |
| Phosphatidylcholine      | 26.088 | 21.077 | 38.680 | 36.270 | 26.469 | 41.815 | 31.917 | 33.044 | 20.967 | 17.553 | 31.225 | 32.340 | 0.027  | 0.026  | 31.733 | 27.841   | 0.394        |
| Phosphatidylethanolamini | 12.230 | 12.416 | 22.146 | 13.846 | 16.444 | 20.947 | 27.409 | 24.159 | 13.067 | 15.011 | 25.292 | 25.826 | 0.019  | 0.021  | 16.338 | 21.794   | 0.105        |
| Phosphatidylserine       | 5.876  | 7.426  | 4.485  | 5.795  | 5.025  | 3.820  | 5.491  | 4.284  | 7.474  | 7.838  | 4.847  | 4.592  | 0.006  | 0.006  | 5.404  | 5.754    | 0.675        |
| PC/PE                    | 2.133  | 1.698  | 1.747  | 2.620  | 1.610  | 1.996  | 1.164  | 1.368  | 1.605  | 1.169  | 1.235  | 1.252  | 1.389  | 1.229  | 1.967  | 1.299    | <b>0.003</b> |
| PC/PS                    | 2.081  | 1.672  | 4.938  | 2.389  | 3.273  | 5.483  | 4.992  | 5.639  | 1.748  | 1.915  | 5.218  | 5.624  | 4.195  | 4.446  | 3.306  | 4.189    | 0.393        |

Supplementary Table 4. The ER Lipid Composition of Obese Mouse Liver Treated with *Pemt* shRNA and *lacZ* Control Virus.

| Samples                  | Ob/pemt shRNAi |       |       |       | ob/lacZ RNAi |       |       |       | pemt:ave |       | lacZ:ave      |  | TTEST |
|--------------------------|----------------|-------|-------|-------|--------------|-------|-------|-------|----------|-------|---------------|--|-------|
|                          | 1              | 2     | 3     | 4     | 1            | 2     | 3     | 4     |          |       |               |  |       |
| Lipid Class (nmol%)      | 1              | 2     | 3     | 4     | 1            | 2     | 3     | 4     |          |       |               |  |       |
| Cholesterol Ester        | 6.39           | 1.95  | 5.11  | 2.55  | 1.43         | 2.22  | 1.43  | 3.98  | 4.00     | 2.27  | 0.2017        |  |       |
| Diacylglycerol           | 1.17           | 1.45  | 1.51  | 1.45  | 1.79         | 2.60  | 1.46  | 1.53  | 1.40     | 1.85  | 0.1515        |  |       |
| Free cholesterol         | 6.96           | 7.83  | 7.76  | 6.84  | 11.42        | 7.99  | 6.86  | 4.01  | 7.35     | 7.57  | 0.8909        |  |       |
| Free fatty acid          | 2.67           | 2.59  | 3.91  | 3.47  | 3.37         | 2.66  | 2.36  | 2.26  | 3.16     | 2.66  | 0.2641        |  |       |
| Triacylglycerol          | 11.69          | 8.57  | 9.33  | 13.46 | 12.33        | 11.45 | 19.90 | 19.76 | 10.76    | 15.86 | 0.0933        |  |       |
| Phospholipids            | 71.13          | 77.61 | 72.36 | 72.22 | 69.67        | 73.07 | 67.98 | 68.46 | 73.33    | 69.79 | 0.1047        |  |       |
| Cardiolipin              | 9.99           | 10.12 | 7.67  | 8.47  | 9.26         | 6.85  | 7.54  | 7.73  | 9.06     | 7.84  | 0.1712        |  |       |
| Lysophosphatidylcholine  | 1.77           | 1.37  | 1.09  | 1.25  | 1.28         | 1.23  | 1.15  | 1.28  | 1.37     | 1.23  | 0.3917        |  |       |
| Phosphatidylcholine      | 30.07          | 34.20 | 32.59 | 35.16 | 37.46        | 41.03 | 37.96 | 40.60 | 33.00    | 39.26 | <b>0.0047</b> |  |       |
| Phosphatidylethanolamine | 24.11          | 25.46 | 24.55 | 21.71 | 18.09        | 17.73 | 17.27 | 15.65 | 23.95    | 17.18 | <b>0.0004</b> |  |       |
| Phosphatidylserine       | 5.19           | 6.46  | 6.48  | 5.64  | 3.59         | 6.22  | 4.07  | 3.21  | 5.94     | 4.27  | 0.0660        |  |       |
| PC/PE                    | 1.25           | 1.34  | 1.33  | 1.62  | 2.07         | 2.31  | 2.20  | 2.60  | 1.38     | 2.29  | <b>0.0006</b> |  |       |
| PC/PS                    | 5.79           | 5.29  | 5.04  | 6.23  | 10.45        | 6.60  | 9.34  | 12.65 | 5.59     | 9.76  | <b>0.0176</b> |  |       |

| Supplementary Table 5. The Difference in the Fatty Acid Composition of ER Lipids from the Liver of Control and Pent Knockdown db/db Mice. |        |       |       |        |       |        |        |        |        |        |        |        |        |        |        |        |        |        |        |        |                                                                                                          |        |        |        |     |     |     |     |    |    |    |    |    |
|-------------------------------------------------------------------------------------------------------------------------------------------|--------|-------|-------|--------|-------|--------|--------|--------|--------|--------|--------|--------|--------|--------|--------|--------|--------|--------|--------|--------|----------------------------------------------------------------------------------------------------------|--------|--------|--------|-----|-----|-----|-----|----|----|----|----|----|
|                                                                                                                                           | 14:0   | 15:0  | 16:0  | 18:0   | 20:0  | 22:0   | 14:1n5 | 16:1n7 | 18:1n7 | 18:1n9 | 20:1n9 | 20:3n9 | 18:2n6 | 18:3n6 | 20:2n6 | 20:3n6 | 20:4n6 | 22:4n6 | 20:5n3 | 22:5n3 | 22:6n3                                                                                                   | %SFA   | %MUFAs | %PUFAs | %n3 | %n6 | %n7 | %n9 |    |    |    |    |    |
| Fatty Acids (mg/%)                                                                                                                        | 14:0   | 15:0  | 16:0  | 18:0   | 20:0  | 22:0   | 14:1n5 | 16:1n7 | 18:1n7 | 18:1n9 | 20:1n9 | 20:3n9 | 18:2n6 | 18:3n6 | 20:2n6 | 20:3n6 | 20:4n6 | 22:4n6 | 20:5n3 | 22:5n3 | 22:6n3 <td>%SFA</td> <td>%MUFAs</td> <td>%PUFAs</td> <td>%n3</td> <td>%n6</td> <td>%n7</td> <td>%n9</td> | %SFA   | %MUFAs | %PUFAs | %n3 | %n6 | %n7 | %n9 |    |    |    |    |    |
| Cardiolipin                                                                                                                               | -0.316 | NS    | NS    | -2.764 | NS    | NS     | NS     | NS     | NS     | NS     | NS     | NS     | -1.531 | NS     | NS     | NS     | NS     | -0.149 | NS     | NS     | NS                                                                                                       | 4.483  | NS     | NS     | NS  | NS  | NS  | NS  | NS | NS |    |    |    |
| Cholesterol Ester                                                                                                                         | -6.206 | NS    | NS    | NS     | NS    | NS     | NS     | NS     | NS     | NS     | NS     | NS     | NS     | NS     | NS     | NS     | NS     | NS     | NS     | NS     | NS                                                                                                       | NS     | NS     | NS     | NS  | NS  | NS  | NS  | NS | NS | NS |    |    |
| Dicacylglycerol                                                                                                                           | 0.512  | NS    | 4.832 | 5.737  | NS    | NS     | NS     | -1.519 | NS     | -5.218 | NS                                                                                                       | -2.148 | 1.177  | -7.932 | NS  | NS  | NS  | NS  | NS | NS | NS |    |    |
| Free fatty acid                                                                                                                           | 1.006  | NS    | NS    | NS     | NS    | NS     | 0.183  | NS     | -0.621 | NS                                                                                                       | NS     | NS     | NS     | NS  | NS  | NS  | NS  | NS | NS | NS |    |    |
| Lysophosphatidylcholine                                                                                                                   | 0.442  | NS    | NS    | NS     | NS    | NS     | NS     | NS     | NS     | NS     | NS     | NS     | -0.197 | NS                                                                                                       | NS     | NS     | NS     | NS  | NS  | NS  | NS  | NS | NS | NS | NS |    |
| Phosphatidylcholine                                                                                                                       | 0.09   | 0.042 | 5.739 | -3.965 | NS    | NS     | NS     | 0.427  | NS                                                                                                       | NS     | NS     | NS     | NS  | NS  | NS  | NS  | NS | NS | NS | NS |    |
| Phosphatidylethanolamine                                                                                                                  | -0.131 | NS    | 2.482 | -2.726 | NS    | -0.068 | NS                                                                                                       | NS     | NS     | NS     | NS  | NS  | NS  | NS  | NS | NS | NS | NS | NS |
| Phosphatidylserine                                                                                                                        | 0.281  | NS    | NS    | -4.075 | 0.127 | NS                                                                                                       | NS     | NS     | NS     | NS  | NS  | NS  | NS  | NS | NS | NS | NS | NS |
| Triacylglycerol                                                                                                                           | 0.3    | NS    | NS    | NS     | NS    | NS     | NS     | NS     | -0.943 | NS     | -0.245 | NS                                                                                                       | NS     | NS     | NS     | NS  | NS  | NS  | NS  | NS | NS | NS | NS | NS |

NS = no significant changes ( $p > 0.05$ , Student's t-test). Values are presented as mean (mg/%) difference between Pent1 knockdown (db/db) animals and 1 age7 controls (Pent1 shRNA - 1 age7 shRNA).

Supplementary Table 6. Oligos Used in This Study

| Genes           | Orientation | Sequence                                               | Usage       |
|-----------------|-------------|--------------------------------------------------------|-------------|
| 18S             | forward     | AGCCCCTGCCCTTTGTACACA                                  | q-PCR       |
| 18S             | reverse     | CGATCCGAGGGCCTCACTA                                    | q-PCR       |
| 28S             | forward     | TGTTGACGCGATGTGATTTCTGCC                               | q-PCR       |
| 28S             | reverse     | AGATGACGAGGCATTTGGCTACCT                               | q-PCR       |
| Ces3            | forward     | ATGCGCCTCTACCTCTGATA                                   | q-PCR       |
| Ces3            | reverse     | AGCAAATCTCAAGGAGCCAAG                                  | q-PCR       |
| Dak             | forward     | TCGGGAAAGGGATGCTAACAG                                  | q-PCR       |
| Dak             | reverse     | CAAGTCCAAAGTTGAGCCGAT                                  | q-PCR       |
| Dgat2           | forward     | GCGCTACTTCCGAGACTACTT                                  | q-PCR       |
| Dgat2           | reverse     | GGGCCTTATGCCAGGAAACT                                   | q-PCR       |
| Fas             | forward     | TATCAAGGAGGCCCATTTTGC                                  | q-PCR       |
| Fas             | reverse     | TGTTTCCACTTCTAAACCATGCT                                | q-PCR       |
| Herpud1         | forward     | CTGGGGACTCCTCAAGTGATG                                  | q-PCR       |
| Herpud1         | reverse     | ACGTTGTGTAGCCAGAGAAGC                                  | q-PCR       |
| LacZ            | top         | CACCGCTACACAAATCAGCGATTTTCGAAAATCGCTGATTTGTGTAG        | shRNA       |
| LacZ            | bottom      | AAAACCTACACAAATCAGCGATTTTCGAAAATCGCTGATTTGTGTAGC       | shRNA       |
| Mttp            | forward     | ATACAAGCTCACGTACTCCACT                                 | q-PCR       |
| Mttp            | reverse     | TCCACAGTAACACAACGTCCA                                  | q-PCR       |
| Pcyt1a          | forward     | GATGCACAGAGTTCAGCTAAAGT                                | q-PCR       |
| Pcyt1a          | reverse     | TGGCTGCCGTAAACCAACTG                                   | q-PCR       |
| Pcyt2           | forward     | TGTGTTACGGCAATGACATC                                   | q-PCR       |
| Pcyt2           | reverse     | TTCCCGGTA CTAGAGGACAT                                  | q-PCR       |
| Pemt            | forward     | TTGGGGATTGCTGTTTGTGCT                                  | q-PCR       |
| Pemt            | reverse     | CACGCTGAAGGGAAATGTGG                                   | q-PCR       |
| Ptdss1          | forward     | GCAGGACTCTGAGCAAGGATG                                  | q-PCR       |
| Ptdss1          | reverse     | GGCGAAGTACATGAGGCTGAT                                  | q-PCR       |
| Ptdss2          | forward     | GGATTGCCTTTTCAGTTCACGC                                 | q-PCR       |
| Ptdss2          | reverse     | AGGTAGAAGGTGTTTCAGCTCTG                                | q-PCR       |
| Scd1            | forward     | TTCTTGCGATACACTCTGGTGC                                 | q-PCR       |
| Scd1            | reverse     | CGGGATTGAATGTTCTTGTCTG                                 | q-PCR       |
| Serca2 (Atp2a2) | forward     | CATGCACCGATGGGATTTCT                                   | q-PCR       |
| Serca2 (Atp2a2) | reverse     | CGCTAAAGTTAGTGTCTGTGCT                                 | q-PCR       |
| Pemt            | top         | CACCGCCATGTCCCGACACACTAACTCGAGTTAGTGTGTCCGGACATGG      | shRNA       |
| Pemt            | bottom      | AAAACCATGTCCCGACACACTAACTCGAGTTAGTGTGTCCGGACATGGC      | shRNA       |
| Serca2b         | forward     | CACCGCCGTTTGTAAATTCTGCTTATCTCGAGATAAGCAGAATTACAAACGGC  | shRNA       |
| Serca2b         | reverse     | AAAAAGCCGTTTGTAAATTCTGCTTATCTCGAGATAAGCAGAATTACAAACGGC | shRNA       |
| Serca2b         | forward     | GCCATGGAGAACGCGCACAC                                   | ORF cloning |
| Serca2b         | reverse     | AGACCAGAACATATCGCTAAAGTTAG                             | ORF cloning |
